# Supplementary material for: Assessment of Heavy Metal Contamination in Dust in Vilnius Schools: Source Identification, Pollution Levels, and Potential Health Risks for Children
Source: MDPI journal article supplement (doi:10.3390/toxics12030224), 2024-03-19
Supplement: s1 [file s1]

# Assessment of Heavy Metal Contamination in Dust in Vilnius Schools: Source Identification, Pollution Levels, and Potential Health Risks for Children

**Murat Huseyin Unsal** <sup>1,\*</sup>, **Gytautas Ignatavičius** <sup>1</sup>, **Arunas Valiulis** <sup>2,3</sup>, **Nina Prokopciuk** <sup>2</sup>, **Roberta Valskienė** <sup>4</sup> and **Vaidotas Valskys** <sup>1,5</sup>

<sup>1</sup> Institute of Biosciences, Life Sciences Center, Vilnius University, Saulėtekio Ave. 7, 10257 Vilnius, Lithuania; gytautas.ignatavicius@gf.vu.lt (G.I.); vaidotas.valskys@gmc.vu.lt (V.V.)

<sup>2</sup> Clinic of Children's Diseases, Institute of Clinical Medicine, Medical Faculty, Vilnius University, Antakalnio St. 57, 10207 Vilnius, Lithuania

<sup>3</sup> Department of Public Health, Institute of Health Sciences, Medical Faculty, Vilnius University, M. K. Čiurlionio St. 21, 03101 Vilnius, Lithuania

<sup>4</sup> Nature Research Centre, Laboratory of Ecotoxicology, Akademijos St. 2, 08412 Vilnius, Lithuania; roberta.valskiene@gamtc.lt

<sup>5</sup> Nature Research Centre, Laboratory of Climate and Water Research, Akademijos St. 2, 08412 Vilnius, Lithuania

\* Correspondence: murat.unsal@gmc.stud.vu.lt

Table S1: Mean concentration of sampled schools in mg/kg

| mg/kg | As    | Cu     | Zn       | Zr    | Sr     | Rb    | Pb     | Cr     | V      | Sc     | Fe       |
|-------|-------|--------|----------|-------|--------|-------|--------|--------|--------|--------|----------|
| S1    | 13.11 | 66.93  | 1873.24  | 62.95 | 56.70  | 14.21 | 116.48 | 164.35 | 33.19  | 176.10 | 3707.10  |
| S2    | 33.93 | 91.33  | 16131.34 | 61.91 | 128.65 | 9.66  | 415.47 | 192.09 | 150.86 | 202.56 | 8549.42  |
| S3    | 8.34  | 80.72  | 632.33   | 61.20 | 143.53 | 14.07 | 63.30  | 76.56  | 26.17  | 207.88 | 8767.57  |
| S4    | 4.55  | 199.18 | 598.57   | 38.37 | 52.04  | 10.25 | 72.44  | 108.41 | 49.77  | 174.32 | 2504.30  |
| S5    | 8.24  | 70.31  | 1186.70  | 25.13 | 58.97  | 9.61  | 39.57  | 158.74 | 29.55  | 226.99 | 5574.71  |
| S6    | 7.29  | 81.37  | 420.50   | 32.68 | 53.76  | 13.06 | 65.56  | 221.18 | 29.41  | 207.08 | 3781.25  |
| S7    | 15.42 | 51.28  | 839.02   | 32.10 | 52.80  | 13.00 | 82.94  | 145.07 | 29.93  | 190.16 | 5268.82  |
| S8    | 12.68 | 55.68  | 2464.17  | 44.09 | 68.22  | 12.62 | 90.84  | 135.88 | 37.05  | 231.05 | 3079.35  |
| S9    | 13.32 | 68.52  | 871.25   | 57.65 | 161.86 | 15.01 | 107.50 | 121.79 | 33.70  | 336.43 | 7588.79  |
| S10   | 5.03  | 82.83  | 611.95   | 42.86 | 27.85  | 14.00 | 5.30   | 90.99  | 37.26  | 126.04 | 3357.46  |
| S11   | 6.64  | 159.60 | 1522.27  | 37.82 | 127.58 | 11.04 | 86.20  | 61.78  | 25.70  | 227.53 | 7724.22  |
| S12   | 15.64 | 64.46  | 1595.86  | 31.88 | 68.24  | 9.53  | 151.13 | 146.11 | 34.59  | 196.80 | 6438.40  |
| S13   | 6.61  | 58.87  | 497.30   | 27.92 | 29.51  | 7.76  | 16.41  | 132.96 | 32.78  | 132.76 | 1621.90  |
| S14   | 69.96 | 88.26  | 4323.60  | 27.65 | 124.73 | 16.12 | 564.25 | 175.00 | <BDL   | 220.03 | 25649.29 |
| S15   | 5.49  | 121.60 | 470.05   | 20.03 | 66.24  | 10.16 | 22.38  | 99.16  | <BDL   | 270.63 | 3530.75  |
| S16   | 7.70  | 53.51  | 219.50   | 37.51 | 470.53 | 9.22  | 40.59  | <BDL   | 68.05  | 811.54 | 2122.49  |
| S17   | 5.25  | 121.13 | 352.42   | 18.97 | 71.38  | 10.34 | <BDL   | 118.75 | <BDL   | 307.46 | 3225.05  |
| S18   | <BDL  | 93.04  | 514.97   | 34.45 | 92.09  | 14.58 | 20.36  | 60.82  | <BDL   | 306.15 | 3860.89  |
| S19   | 5.65  | 95.16  | 235.32   | 32.85 | 56.53  | 8.58  | <BDL   | 131.14 | 48.06  | 372.64 | 3022.12  |
| S20   | 13.83 | 55.36  | 2228.31  | 33.83 | 57.17  | 13.42 | 66.23  | 198.55 | 46.68  | 176.58 | 3780.50  |
| S21   | 5.84  | 73.20  | 409.87   | 27.41 | 76.72  | 14.65 | <BDL   | 104.99 | <BDL   | 155.36 | 2942.69  |
| S22   | <BDL  | 56.05  | 332.52   | 29.78 | 38.38  | 8.18  | <BDL   | 143.30 | <BDL   | 118.25 | 1569.18  |
| S23   | <BDL  | 395.37 | 6252.00  | 42.53 | 162.70 | 16.77 | 67.91  | 120.13 | 125.67 | 204.97 | 4463.36  |
| S24   | <BDL  | 87.28  | 599.02   | 24.76 | 72.72  | 12.53 | 46.88  | 87.28  | 42.01  | 193.58 | 10063.49 |

BDL = Below Detection Limit

Table S2: Dust concentrations found in similar research.

| Locations                          | Cr     | Cu     | Zn       | Pb     | Fe      | As    | References |
|------------------------------------|--------|--------|----------|--------|---------|-------|------------|
| Malaysia, Indoor dust              | 16.88  | 30.19  | 148.71   | 31.24  | 4225.33 | -     | [2]        |
| Iraq, Indoor dust                  | 65.68  | 54.28  | 43.90    | 51.46  | -       | -     | [3]        |
| Nigeria, Indoor dust               | 41.80  | 12.70  | 121.00   | 27.60  | 13.70   | 2.04  | [13]       |
| Hong Kong, Indoor and Outdoor dust | -      | 247.38 | 2293.56  | 199.96 | -       | -     | [14]       |
| Ghana, Indoor dust                 | 381.30 | -      | -        | 4.82   | -       | -     | [15]       |
| Istanbul, Outdoor dust             | 254.00 | 513.00 | 1970.00  | 192.00 | -       | -     | [18]       |
| Istanbul, Outdoor dust             | 89.00  | 200.00 | 984.00   | 30.00  | -       | -     |            |
| Warsaw, Outdoor dust               | 90.00  | 109.00 | 1070.00  | 124.00 | -       | -     |            |
| New Zealand, Indoor dust           | -      | -      | 21700.00 | 724.00 | -       | -     |            |
| South Africa, Outdoor dust:        |        |        |          |        |         |       |            |
| School A                           | 87.90  | 38.00  | 148.70   | 12.45  | -       | 2.90  | [76]       |
| School B                           | 37.13  | 60.97  | 107.35   | 15.86  | -       | 0.78  |            |
| School C                           | 57.45  | 7.78   | 45.10    | 8.08   | -       | 1.66  |            |
| School D                           | 82.40  | 28.66  | 315.10   | 52.68  | -       | 1.60  |            |
| School E                           | 45.60  | 44.91  | 9.53     | 16.49  | -       | 2.07  |            |
| School F                           | 34.90  | 116.80 | 37.50    | 24.43  | -       | 0.99  |            |
| School G                           | 24.35  | 66.85  | 37.90    | 62.85  | -       | 1.82  |            |
| School H                           | 27.15  | 416.65 | 41.10    | 184.20 | -       | 0.96  |            |
| Greece, Outdoor dust               | 87.00  | -      | 1505.00  | 133.00 | -       | -     | [77]       |
| Sydney, Indoor dust                | 90.00  | -      | 1876.00  | 299.00 | -       | 17.60 | [19]       |
| Ottawa, Indoor dust                | 86.70  | 206.00 | 717.00   | 406.00 | -       | 7.30  |            |
| Canada, Indoor dust                | 117.00 | 279.00 | 833.00   | 210.00 | -       | 13.10 |            |
| USA, Indoor dust                   | -      | -      | 876.00   | 109.00 | -       | 6.30  |            |
| Sydney, Indoor dust                | 65.00  | -      | 372.00   | 76.00  | 2790.00 | -     | [21]       |
| China, Indoor and Outdoor dust     | 149.20 | 70.80  | 461.50   | 180.90 | -       | 13.20 |            |
| Hermosillo, Outdoor dust           | -      | 26.34  | 387.98   | 36.15  | -       | -     | [40]       |
| Iran, indoor dust:                 |        |        |          |        |         |       |            |
| Cold Season                        | 67.00  | 158.00 | 513.00   | 56.00  | -       | -     | [20]       |
| Warm Season                        | 97.00  | 127.60 | 666.70   | 292.00 | -       | -     |            |
| Tokyo and Hiroshima                | 67.80  | 304.00 | 920.00   | 57.90  | -       | -     |            |

Table S3 Potential pollution sources for HCA, PCA and PMF factors

| <b>Analysis Method</b> | <b>Identified Elements</b>                            | <b>Potential Pollution Sources</b>                     |
|------------------------|-------------------------------------------------------|--------------------------------------------------------|
| <b>HCA</b>             | Cluster 1: Sr and Sc<br>Cluster 2: As, Pb, Cr, and Fe | Urban road dust (vehicular non-exhaust emissions, road |

|                     |                                                                                           |                                                                                                                                                                                                                                                                |
|---------------------|-------------------------------------------------------------------------------------------|----------------------------------------------------------------------------------------------------------------------------------------------------------------------------------------------------------------------------------------------------------------|
|                     | Cluster 3: Cu, Zn, Zr, Rb, and V                                                          | pavement/furniture), power plants, roads, highways, train stations, wind dispersion, local sediment                                                                                                                                                            |
| <b>PCA</b>          | Cluster 1: Sr and Sc<br>Cluster 2: As, Pb, Cr, and Fe<br>Cluster 3: Cu, Zn, Zr, Rb, and V | Similar patterns across all elements suggest common sources as HCA                                                                                                                                                                                             |
| <b>PMF Factor 1</b> | Zn, V, Pb, Cr, Cu, As                                                                     | Electronics, construction, vehicular exhaust and tires debris, road dust, fossil fuel burning, industrial gases, zinc-coated materials in schools                                                                                                              |
| <b>PMF Factor 2</b> | Fe, Cu                                                                                    | Cars (brake pads, discs, exhaust system), industrial activities, fossil fuel combustion, waste disposal, road dust, train station emissions, copper-brass automotive radiators, car lubricants                                                                 |
| <b>PMF Factor 3</b> | Cr, Zr, Rb, Cu, As, Sc, V                                                                 | Coal and oil combustion, rainwater migration through soil, road dust emissions, wear and tear of asbestos linings and cement dust, Cr-coated metals, waste disposal sites, manufacturing and utilization of zirconium-based products, rubidium-based compounds |
| <b>PMF Factor 4</b> | Pb, As, Fe                                                                                | Coal-fired power generation, wood preservatives, waste disposal, road dust, construction activities, atmospheric pollution, phosphate fertilizers, lead-based paint on aging school structures, degradation of building materials                              |
| <b>PMF Factor 5</b> | Sr, Sc, Rb, V                                                                             | Production and disposal of electronic devices (particularly fluorescent lamps), domestic heating, automotive traffic, alloy production with metals                                                                                                             |
